# Supplementary material
Source: PubMed Central journal article supplement (PMC3127927)
Supplement: 1019224108_sapp.pdf [file 1019224108_sapp.pdf]

## SUPPORTING INFORMATION

Lutz et al. 2011

### 1. Supplemental Materials and Methods

**Mice.** Ter3 transgenic animals were established using the vector  $\mu$ Ter3 described previously (ref. 1). Briefly, we changed codon 3 in the leader peptide of the H chain expression vector  $\mu$ GPT to an in-frame TGA stop codon and replaced downstream in-frame ATG codons in the  $V_H$  region sequence by Ala codons to prevent reinitiation and translation of a truncated H chain protein. To construct transgenic Ter3 mice, a 12.3kb *SalI/XhoI* fragment bearing the IgH promoter, the Ter3  $V_H$  region of the hybridoma 17.2.25 and a genomic  $C\mu$  region from a Sv129 mouse (H chain allotype a) was isolated from  $\mu$ Ter3 and injected into the pronucleus of C57/BL6 oocytes. Three independent lines (7204, 7302, and 7307) were established by backcrossing the corresponding founders to C57/BL6 animals. Here we present data of the 7307 line. The insertion sites of the lines 7204 and 7307 were mapped by circular PCR to positions chr5: 109.975.633 and chr5:10.473.198, respectively. Offspring were screened by PCR for the presence of the Ter3 transgene. Wildtype configuration of the allele was detected in with primers flanking the insertion site. For 7204 line, we used the primers 5' of Ter7204 fwd (CAA GAC AAC TCT CGA CTA CAT GTG AG) and 3' of Ter7204 rev (CTG TCC TGA AAC TCA CCT TGT AGA CC) and for 7307 line the primers 5' of Ter7307 fwd2 (AAC ATC AAG TTT CCA AGT AGT GGT GG) and 3' of Ter7307 rev3 (GCT TCT ACT AGA TTC AGT GTA TCT GG). Presence of the transgene was detected with the respective forward primer and the primer IgM<sub>Ter113</sub> rev (CTG TCA AAG CTA CTT GAT GAG GAT GC), which binds to a sequence in the transgene. QM (ref. 2),  $V_H$ B1-8 (ref. 3), Ter5H (pII in ref. 4) and Ter5L (p $\Delta$  in ref 4) mice have been described previously. All animal experiments were performed according to institutional and national guide lines.

**Antibodies.** Fluorochrome-conjugated mAbs against CD19 (clone 1D3, PerCP), c-kit (clone ack45, PE), CD25 (clone PC61, PE), IgM<sup>a</sup> (clone DS-1, FITC), and IgM<sup>b</sup> (clone AF6-78, PE) were purchased from BD PharMingen and Cy5-conjugated goat abs against mouse  $\mu$ H chain from Southern Biotechnology. The unlabeled monoclonal rat antibody against the  $V_H$ 17.2.25 idiotype (clone R2.438.8, kind gift of T. Imanishi-Kari, Tufts University, Boston, MA) were detected with a secondary Cy5-conjugated goat-anti-rat IgG serum (Chemicon).

**Flow cytometry.** Single cell suspensions were prepared from bone marrow, spleen and thymus of 6- to 8-week-old mice. Erythrocytes were removed by incubation with 0.15 M  $NH_4Cl$ , 20 mM

HEPES for 5min at RT, and cells were membrane-stained with respective antibodies for 60 min on ice. For intracellular staining, cells were first fixed and permeabilized using the Fix and Perm kit (An der Grub Biotechnologies). Stained cells were examined in a FACSCalibur (BD Biosciences), and data were analyzed with the Cell Quest software (BD Biosciences). Cell sorting was performed on a MoFlo cell sorter (DakoCytomation). Only events falling in the viable lymphocyte gate, as judged by forward/sideward scattering, are shown in histograms and dot plots.

**Quantitative TaqMan PCR (qPCR).** All qPCRs were performed on Applied Biosystems 7300 or 7500 Real-Time PCR Systems. The amount of Ter5 mRNA was measured in splenocytes from heterozygous V<sub>H</sub>B1-8, Ter5<sup>High</sup> (Ter5H) and Ter5<sup>Low</sup> (Ter5L) mice using primers V<sub>H</sub>B1-8 fwd (GAG CTG TAT CAT CAT CCT CTT CTT G) or Ter5-VHb1-8 fwd (GAG CTG ACT CAT CAT CCT CTT CTT G) with V<sub>H</sub>B1-8 rev (CAG GCT GCT GCA GTT GGA) and the fluorescently labeled V<sub>H</sub>B1-8 probe (6FAM-AGC AAC AGC TAC AGG TGT CCA CTC CCA-TAM). To detect V<sub>H</sub>1-D<sub>H</sub>3 recombinations, genomic DNA from FACS-sorted CD19<sup>+</sup>/c-kit<sup>+</sup> pro-B cells was analyzed using the primers V<sub>H</sub>1-FR3 fwd (GAG GAC TCT GCR GTC TAT TWC TGT GC, ref. 5) and J<sub>H</sub>3 rev (CCC TGA CCC AGA CCC ATG T) and the fluorescently labeled J<sub>H</sub>3 probe (6FAM-TTC AAC CCC TTT GTC CCA AAG TT-TAM). The amount of germline or DQ<sub>52</sub>J<sub>H</sub> rearranged IgH loci was measured on genomic DNA isolated from sorted CD19<sup>+</sup>/c-kit<sup>+</sup>/surface IgM<sup>-</sup> pro-B cells using the primers DQ<sub>52</sub> fwd (CAA GAG ATG ACT GGC AGA TTG G) and DQ<sub>52</sub> rev (TCA AAA CCT TGC ACC AGT CAG A) and the fluorescently labeled DQ<sub>52</sub> probe (6FAM-ATA CCC ATA CTC TGT GGC TAG TGT GAG GTT TAA GCC-TAM). These primers amplify a sequence 5' of the D<sub>Q52</sub> gene segment, including its 5' RSS, which is only present on germline or D<sub>Q52</sub>J<sub>H</sub> rearranged IgH loci, because it is deleted in all other D-to-J<sub>H</sub> rearrangements or a V<sub>H</sub>-to-D<sub>Q52</sub> rearrangement.

**Quantification of Ter3- $\mu$ H mRNA amounts.** To compare the amounts of Ter3 transcripts to that of endogenously encoded sense  $\mu$ H transcripts, Ter3 mice were bred to quasi monoclonal (QM) mice carrying a copy of the productive wildtype V<sub>H</sub>17.2.25 VDJ exon (i.e., without a nonsense codon) homologously targeted into the IgH locus (2). Thereby, abundances of nonsense V<sub>H</sub>17.2.25- $\mu$ H (Ter3) mRNA expressed from the Ter3 transgene and sense V<sub>H</sub>17.2.25- $\mu$ H mRNA from the endogenous IgH locus can be compared. Total RNA was isolated from sorted c-kit<sup>+</sup>/CD19<sup>+</sup> bone marrow and splenic CD19<sup>+</sup>/V<sub>H</sub>17.2.25 idiotype<sup>+</sup> B cells from IgH<sup>QM/wt</sup>, Ter3<sup>Tg</sup> mice. Sense and nonsense transcripts were amplified together by RT-PCR with primers binding to the 5' UTR of both sense V<sub>H</sub>17.2.25- $\mu$ H mRNA and Ter3 mRNA (5'UTR of 17.2.25 fwd, CTA CAG ACA CTG AAT CTC AAG GTC C) and the C $\mu$ 1 region (mC $\mu$ 1 rev, GAA GGA AAT GGT GCT GGG CAG G). The 567bp PCR product was gel purified, digested with *FspI*, which due to the presence of a mutated Ala codon cleaves only the nonsense Ter3 but not sense V<sub>H</sub>17.2.25- $\mu$ H PCR product into a 188bp and a 379bp fragment (Fig. S1), and re-analyzed on an

EtBr agarose gel. The relative amount of Ter3 nonsense mRNA was determined by dividing the band intensity of the 567bp product in digested samples (containing only sense V<sub>H</sub>17.2.25- $\mu$ H mRNAs) by that in undigested samples (containing both sense and nonsense V<sub>H</sub>17.2.25 transcripts). The specificity of the digest was controlled with cDNA from Ag8 hybridoma cells transfected with expression plasmids encoding either the sense (p $\mu$ GPT) or nonsense form (p $\mu$ Ter3) of V<sub>H</sub>17.2.25- $\mu$ H transcripts.

**Statistical methods.** Statistical analysis was performed using the unpaired t test.

## **Additional References**

1. Lutz J, Müller W, & Jäck HM (2006) VH replacement rescues progenitor B cells with two nonproductive VDJ alleles. *J Immunol* 177(10):7007-7014.
2. Cascalho M, Ma A, Lee S, Masat L, & Wabl M (1996) A quasi-monoclonal mouse. *Science* 272(5268):1649-1652.
3. Sonoda E, *et al.* (1997) B cell development under the condition of allelic inclusion. *Immunity* 6(3):225-233.
4. Fukita Y, Jacobs H, & Rajewsky K (1998) Somatic hypermutation in the heavy chain locus correlates with transcription. *Immunity* 9(1):105-114.
5. Delbos F, *et al.* (2005) Contribution of DNA polymerase eta to immunoglobulin gene hypermutation in the mouse. *J Exp Med* 201(8):1191-1196.

## 2. Supplemental Figures and Tables

### Supplementary Figure 1.

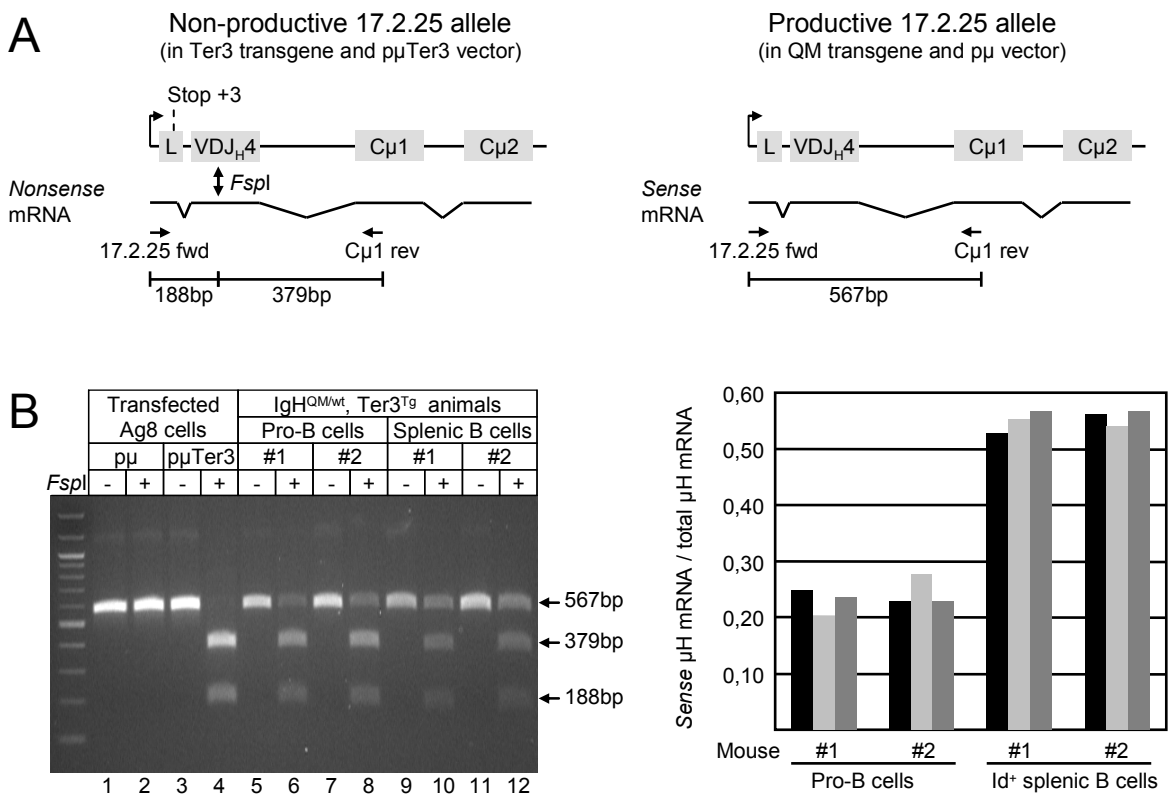

**Supplementary Figure 1.** Comparison of the abundance of nonsense  $\mu$ H transcripts from the Ter3 transgene ( $V_H17.2.25$  VDJ exon with stop = Ter3) with that of sense  $\mu$ H transcripts from the QM allele (productive  $V_H17.2.25$  VDJ targeted into the IgH locus). **(A)** Genomic organization of the wild-type sense and Ter3 nonsense  $V_H17.2.25$  VDJ exon in the respective transgenes and  $\mu$  expression vectors. The conversion of a downstream ATG into an Ala codon created a FspI restriction site in the nonsense allele, which distinguishes the two  $V_H17.2.25$  exons. PCR primer pairs are indicated by arrows. **(B)** RT-PCR analysis of  $V_H17.2.25$  mRNA in Ag8 plasmacytoma cells transfected with the sense  $\mu$  and nonsense  $\mu$ Ter3 plasmid and in B lymphoid populations isolated from Ter3 transgenic mice heterozygous for the knock-in wild-type  $V_H17.2.25$  VDJ exon (IgH<sup>QM/wt</sup>, Ter3<sup>Tg</sup> mice). RNA was isolated from transfected Ag8 cells as well as sorted c-kit<sup>+</sup> pro-B cells and  $V_H17.2.25$  idiotype<sup>+</sup> splenic B cells.  $V_H17.2.25$ - $\mu$ H mRNA was amplified by RT-PCR with the primers indicated in panel A and purified and electrophoretically separated before (-) or after (+) FspI digest. The ethidium bromide-stained gel was scanned, and ratios of sense

V<sub>H</sub>17.2.25- $\mu$ H mRNA to total V<sub>H</sub>17.2.25- $\mu$ H mRNA were calculated by dividing the intensities of the bands for the full-length 567-bp product in digested samples (containing only indigestible sense V<sub>H</sub>17.2.25- $\mu$ H mRNA) by that from undigested samples (containing both wild-type and Ter3- $\mu$ H mRNA). Results are from three assays, with RNA from two mice (#1 and #2). The analysis revealed a threefold increase in the abundance of Ter3 mRNA in c-kit<sup>+</sup> pro-B cells and about equal amounts of both Ter3 and sense V<sub>H</sub>17.2.25- $\mu$ H transcripts in sorted CD19<sup>+</sup>/V<sub>H</sub>17.2.25 idiotype<sup>+</sup> splenic B cells.

## Supplementary Figure 2.

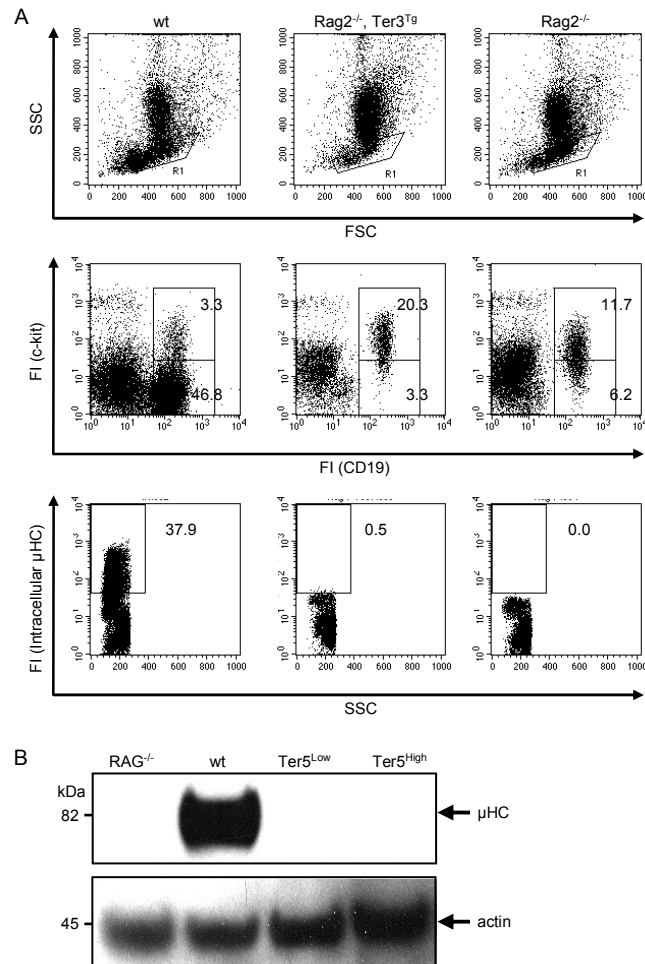

**Supplementary Figure 2. Ter3 and Ter5  $\mu$ H mRNAs are not translated into  $\mu$ H chain protein.** (A) Bone marrow cells of 6-week-old mice were either membrane stained for c-kit and CD19 or fixed and stained for intracellular  $\mu$ H chain ( $\mu$ HC) using a polyclonal goat anti-IgM ( $\mu$ HC-specific) antibody. Fluorescence intensities (FI) of cells in the lymphocyte gate were determined. The percentages of cells in the individual gates are indicated. FSC, forward scatter; SSC, side scatter. (B) Lysates prepared from bone marrow cells of RAG-deficient (Rag<sup>-/-</sup>), wild-type (wt) and homozygous Ter5<sup>Low</sup> and Ter5<sup>High</sup> mice were subjected to Western blot analysis using a polyclonal goat anti- $\mu$ H chain antibody. Actin signals served as control for the integrity and quantity of loaded protein.

# Supplementary Figure 3.

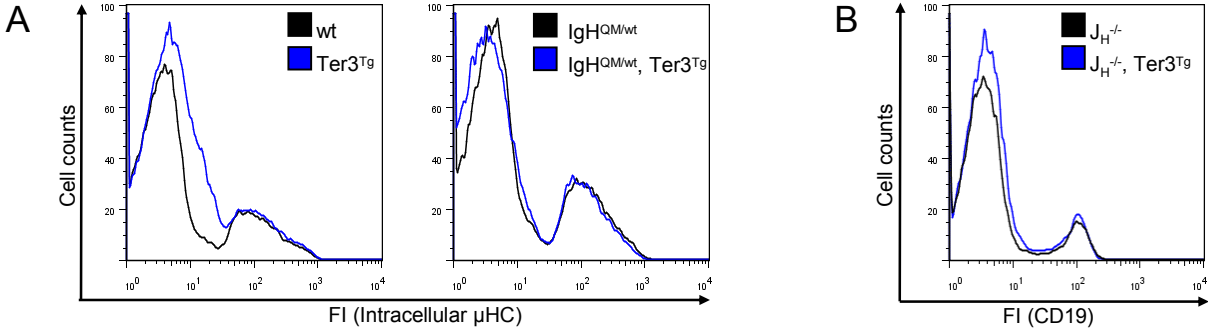

**Supplementary Figure 3. Ter3 mRNA does not affect expression of IgM and CD19 in Ter3 transgenic mice.** (A) Bone marrow cells from 6-week-old mice of the indicated genotypes stained for intracellular  $\mu$ H chain ( $\mu$ HC). (B) Bone marrow cells from  $J_H^{-/-}$  mice membrane stained for CD19.

## Supplementary Figure 4.

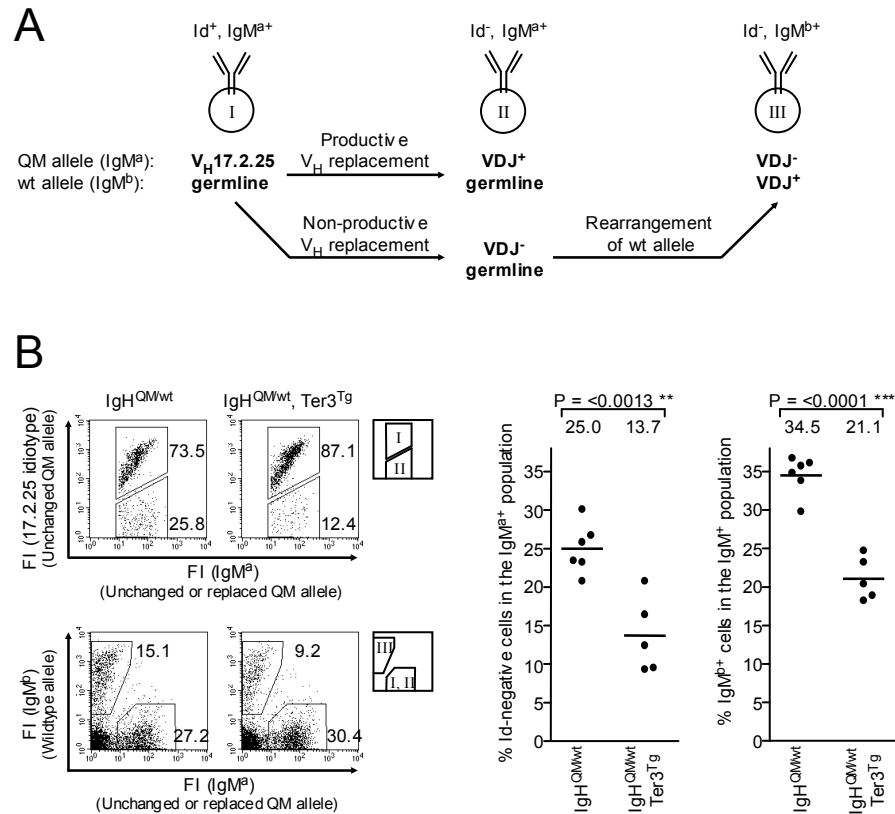

**Supplementary Figure 4.** Ter3 transcripts interfere with V<sub>H</sub> replacement. **(A)** The V<sub>H</sub> exon of the productive knock-in V<sub>H</sub>17.2.25-H chain gene (QM allele) can be modified by V<sub>H</sub> replacement. As a result, B cells in heterozygous IgH<sup>QM/wt</sup> mice can express any of three types of  $\mu$ H chains: (I) the unchanged V<sub>H</sub>17.2.25- $\mu$ H chain with V<sub>H</sub>17.2.25 idiotype (Id<sup>+</sup>) and a  $\mu$ H chain of allotype a (IgM<sup>a</sup>), (II) an  $\mu$ H chain with a productively replaced V<sub>H</sub> domain (Id<sup>-</sup>) and a  $\mu$ H chain of allotype a (IgM<sup>a</sup>), or (III) a  $\mu$ H chain with allotype b (IgM<sup>b</sup>) encoded by a productively rearranged wild-type (wt) allele in cells with a nonproductive replacement (VDJ). **(B)** The effect of the Ter3 transgene on the frequency of V<sub>H</sub> replacement was determined in the bone marrow of 6-week-old mice by flow cytometry in two ways. In the upper panel, the frequency of V<sub>H</sub>17.2.25-Id<sup>+</sup> cells expressing the unchanged QM allele was determined within the IgM<sup>a</sup>-positive population. The lower panel shows the analysis of IgM<sup>a</sup>-positive cells expressing the QM allele and IgM<sup>b</sup>-positive cells expressing a productively rearranged wild-type allele. Expression of the Ter3 transgene reduced the frequencies of both idiotype-negative cells in the IgM<sup>a</sup>-positive B cell population and IgM<sup>b</sup>-positive cells in the total B cell population. These data suggest a suppressive effect of Ter3 mRNA on VDJ recombination. Results for the entire litter are presented in the diagrams to the right; one dot represents one mouse.



## Supplementary Table 1

| Cells x10 <sup>5</sup> | Wildtype       | Ter3 <sup>Tg</sup> | Ter3 <sup>Tg/Tg</sup> |
|------------------------|----------------|--------------------|-----------------------|
| c-kit <sup>+</sup>     | 5.25 (±3.0)    | 6.84 (-)           | 12.66 (±2.36)         |
| CD25 <sup>+</sup>      | 43.85 (±28.27) | 36.32 (-)          | 17.27 (±4.66)         |
| IgM <sup>+</sup>       | 18.73 (±12.64) | 18.98 (-)          | 8.33 (±1.65)          |

**Supplementary Table 1.** Average cell numbers of B cell populations in the bone marrow of 6-week-old Ter3 mice and littermate controls. Data are from a representative litter (mean ± SD).
